# Supplementary material for: Selective mineralization at hydrogel interface induced by fusion between peptide hydrogels
Source: Royal Society of Chemistry journal article supplement (doi:10.1039/d4me00112e), 2024-01-01
Supplement: d4me00112e1.pdf [file d4me00112e1.pdf]

Support information for:

## **Selective mineralization at hydrogel interface induced by fusion between peptide hydrogels**

Yongbaek Kim<sup>a</sup>, Hiroto Isobe<sup>b</sup>, Keishi Nishio<sup>b</sup>, and Kazuki Murai<sup>a\*</sup>

<sup>a</sup> *Department of Chemistry and Materials, Faculty of Textile Science and Technology, Shinshu University, 3-15-1 Tokida, Ueda, Nagano 386-8567, Japan.*

<sup>b</sup> *Department of Materials Science and Technology, Faculty of Advanced Engineering, Tokyo University of Science, 6-3-1 Nijuku, Katsushika-ku, Tokyo 125-8585, Japan.*

\* *Corresponding author: murai\_kazuki@shinshu-u.ac.jp (Dr. K. Murai)*

### **Contents**

- S1.** MALDI-TOF-MS spectra of (a) the VEVS and (b) VKVS peptides.
- S2.** Schematic of the concentration of the added mineral source ions for each peptide hydrogel.
- S3.** Appearance of (a) VEVS and (b) VKVS peptide hydrogels, including (c) TEM images of the VEVS and VKVS peptide networks in hydrogels containing 100% mineral source concentration.
- S4.** FT-IR spectra of VEVS peptide systems (upper part) and the VKVS (lower part) peptide systems.
- S5.** Changes in the storage elastic modulus ( $G'$ ) and loss elastic modulus ( $G''$ ) with an angular frequency for VEVS (left) and VKVS (right) peptide hydrogel systems containing each mineral source concentration.
- S6.** FT-IR spectra of the mineralized CaP at the fusion interface in VKVS/VEVS, Water/VEVS, VKVS/Water, and Water/Water systems containing 100% mineral source concentration at several mineralization times.

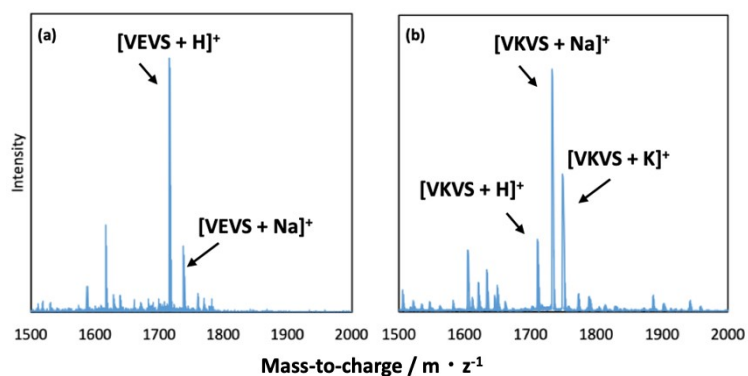

**Fig. S1.** MALDI-TOF-MS spectra of (a) the VEVS and (b) VKVS peptides. Reprinted with permission from Ref. [15]. Copyright 2024, American Chemical Society.

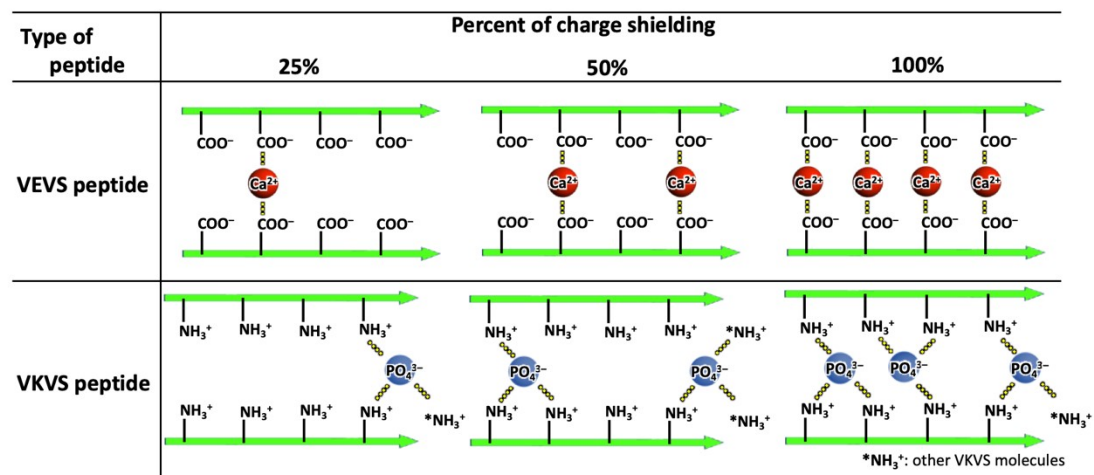

**Fig. S2.** Schematic of the concentration of the added mineral source ions for each peptide hydrogel.

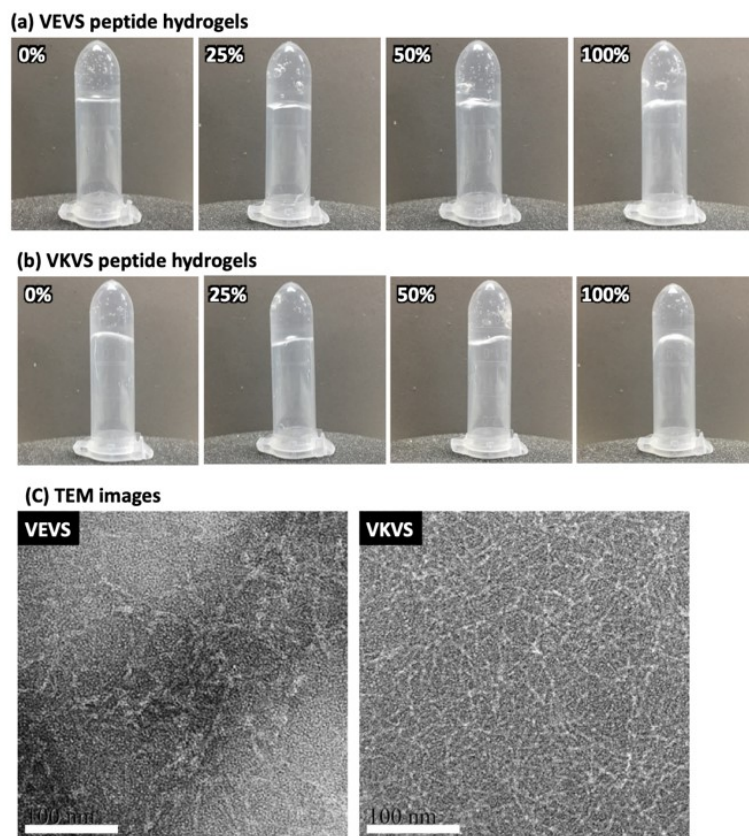

**Fig. S3.** Appearance of (a) VEVS and (b) VKVS peptide hydrogels, including (c) TEM images of the VEVS and VKVS peptide networks in hydrogels containing 100% mineral source concentration. Scale bars = 100 nm.

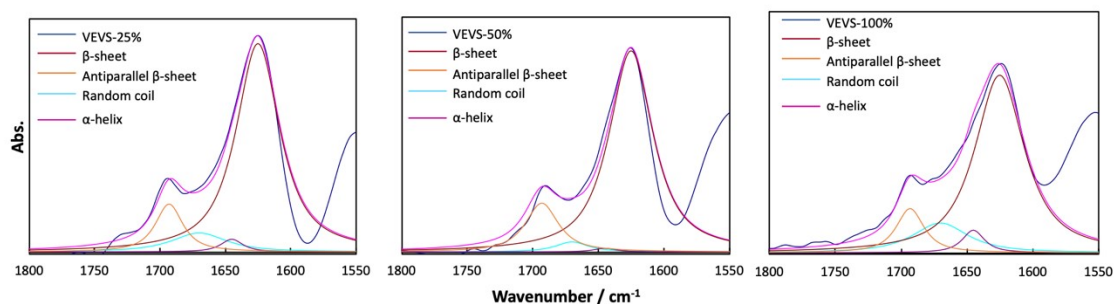

| Concentration of<br>the mineral source | Content/ %      |                |             |
|----------------------------------------|-----------------|----------------|-------------|
|                                        | $\alpha$ -helix | $\beta$ -sheet | Random coil |
| 25%                                    | 3               | 87             | 10          |
| 50%                                    | 1               | 95             | 4           |
| 100%                                   | 5               | 80             | 15          |

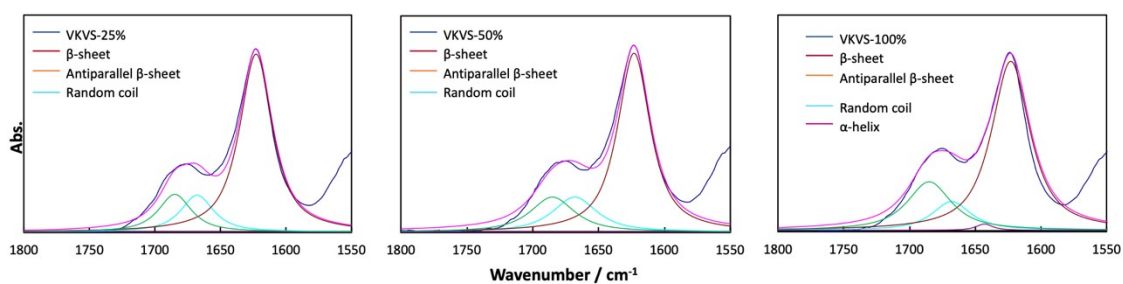

| Concentration of<br>the mineral source | Content/ %      |                |             |
|----------------------------------------|-----------------|----------------|-------------|
|                                        | $\alpha$ -helix | $\beta$ -sheet | Random coil |
| 25%                                    | 0               | 83             | 17          |
| 50%                                    | 0               | 79             | 21          |
| 100%                                   | 2               | 84             | 14          |

**Fig. S4.** FT-IR spectra of VEVS peptide systems (upper part) and the VKVS (lower part) peptide systems.

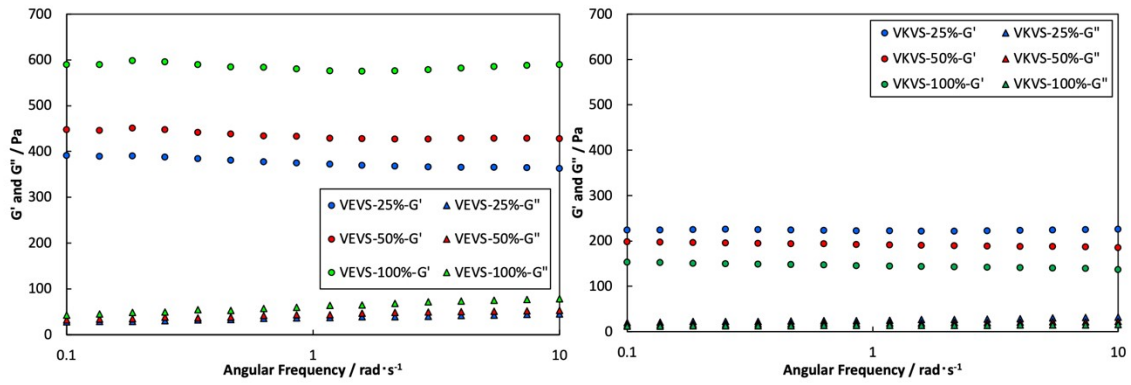

**Fig. S5.** Changes in the storage elastic modulus ( $G'$ ) and loss elastic modulus ( $G''$ ) with an angular frequency for VEVS (left) and VKVS (right) peptide hydrogel systems containing each mineral source concentration.

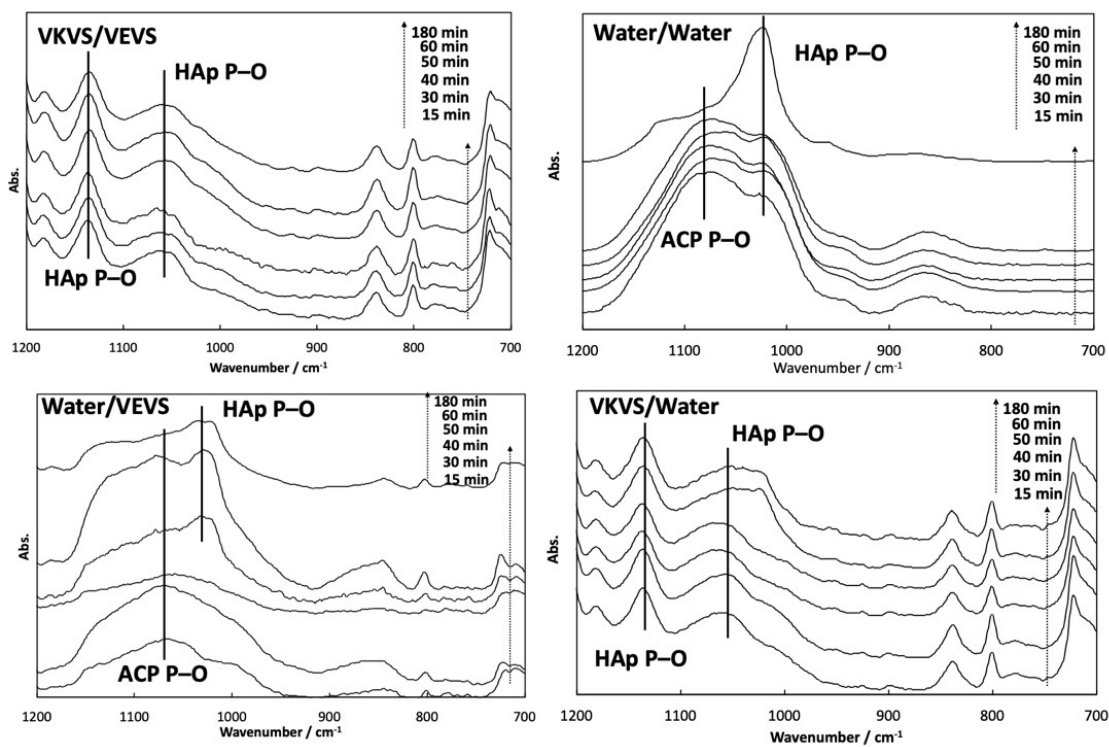

**Fig. S6.** FT-IR spectra of the mineralized CaP at the fusion interface in VKVS/VEVS, Water/VEVS, VKVS/Water, and Water/Water systems containing 100% mineral source concentration at several mineralization times.
